# Supplementary material for: Synchronous oxidation and sequestration for As(iii) from aqueous solution by modified CuFe2O4 coupled with peroxymonosulfate: a fast and stable heterogeneous process
Source: Royal Society of Chemistry journal article supplement (doi:10.1039/d0ra09324f), 2021-01-01
Supplement: d0ra09324f1.pdf [file d0ra09324f1.pdf]

## **Supporting Information**

### **Synchronous oxidation and sequestration for As(III) from aqueous solution by modified $\text{CuFe}_2\text{O}_4$ coupled with peroxymonosulfate: A fast and stable heterogeneous process**

Fu Liu, Jian-Feng Wu, Guang-Chao Zhao \*

School of Ecology and Environment, Anhui Normal University, Wuhu 241000, P. R. China.

E-mail: gczhao@mail.ahnu.edu.cn

### Test S1

The As(V) concentration was determined by using the modified molybdate-based method.<sup>1</sup> Briefly, 1 ml of reaction solution was diluted with 2% HCl rather than HNO<sub>3</sub> immediately after withdrawing due to the presence of nitrate leads to color instability, and then mixed with 0.5 ml specified molybdate agent in a 10 ml vials. Of note, samples must be spiked to at least 20  $\mu$ M PO<sub>4</sub><sup>3-</sup>. The absorbance of mixed solution was measured at 880 nm with a UV-vispectrophotometer (TU-1901, China) after 20 min.<sup>1</sup>

**Table S1.** Comparison of the As(III) adsorption capacity between various Fe-based spinel adsorbents.

| Adsorbents                                                                             | Reaction conditions | As(III) Adsorption capacity (mg/g) | Ref.         |
|----------------------------------------------------------------------------------------|---------------------|------------------------------------|--------------|
| CoFe <sub>2</sub> O <sub>4</sub>                                                       | pH = 3.0, T = 25°C  | 100                                | 2            |
| MnFe <sub>2</sub> O <sub>4</sub>                                                       | pH = 6.9            | 27.27                              | 3            |
| CuFe <sub>2</sub> O <sub>4</sub>                                                       | pH = 4.2, T = 35°C  | 41.2                               | 4            |
| CCF                                                                                    | pH = 7.0, T = 50°C  | 45                                 | 5            |
| Mn <sub>0.5</sub> Cu <sub>0.5</sub> Fe <sub>1.2</sub> Al <sub>0.8</sub> O <sub>4</sub> | pH = 6.0, T = 40°C  | 0.053                              | 6            |
| CuFe <sub>2</sub> O <sub>4</sub> /PMS                                                  | pH = 7.0, T = 30°C  | 63.9                               | 7            |
| CuAl <sub>2</sub> O <sub>4</sub> /PMS                                                  | pH = 7.0, T = 25°C  | 66.25                              | 8            |
| CuFe <sub>2</sub> O <sub>4</sub> -Foam/PMS                                             | pH = 7.0, T = 25°C  | 105.78                             | Present work |

**Table S2.** Kinetics constants for As(III) adsorption by the CuFe<sub>2</sub>O<sub>4</sub>-Foam/PMS system.

| Pseudo-second-order model                    |                           |                       |                |
|----------------------------------------------|---------------------------|-----------------------|----------------|
|                                              | k <sub>2</sub> (g/mg/min) | q <sub>e</sub> (mg/g) | R <sup>2</sup> |
| <b>① Different system</b>                    | -                         | -                     | -              |
| CuFe <sub>2</sub> O <sub>4</sub> -Foam/PMS   | 0.0168                    | 18.76                 | 0.9998         |
| CuFe <sub>2</sub> O <sub>4</sub> -Foam alone | 0.0032                    | 18.72                 | 0.9925         |
| CuFe <sub>2</sub> O <sub>4</sub> /PMS        | 0.0148                    | 9.04                  | 0.9989         |
| <b>② Adsorbent dose</b>                      | -                         | -                     | -              |
| Half piece                                   | 0.0085                    | 18.45                 | 0.9963         |
| One piece                                    | 0.0168                    | 18.76                 | 0.9998         |
| Two pieces                                   | 0.0730                    | 18.62                 | 0.9999         |

|                            |        |       |        |
|----------------------------|--------|-------|--------|
| Three pieces               | 0.1632 | 18.55 | 0.9999 |
| <b>③ Oxidant dose (μM)</b> | -      | -     | -      |
| 50                         | 0.0146 | 18.65 | 0.9996 |
| 100                        | 0.0168 | 18.76 | 0.9998 |
| 200                        | 0.0221 | 18.73 | 0.9996 |
| 400                        | 0.0286 | 18.69 | 0.9997 |
| <b>④ pH</b>                | -      | -     | -      |
| 3.0                        | 0.0199 | 18.73 | 0.9995 |
| 5.0                        | 0.0167 | 18.73 | 0.9992 |
| 7.0                        | 0.0168 | 18.76 | 0.9998 |
| 9.0                        | 0.0156 | 18.76 | 0.9994 |
| 11.0                       | 0.0119 | 18.18 | 0.9976 |
| <b>⑤ Temperature (°C)</b>  | -      | -     | -      |
| 10                         | 0.0149 | 18.73 | 0.9990 |
| 25                         | 0.0168 | 18.76 | 0.9996 |
| 40                         | 0.0170 | 18.76 | 0.9993 |
| 50                         | 0.0185 | 18.73 | 0.9994 |
| 60                         | 0.0203 | 18.69 | 0.9995 |

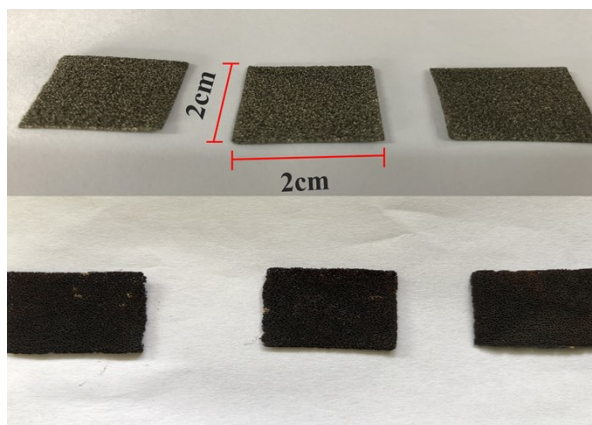

**Fig. S1.** The appearance of Fe-Ni foam and CuFe<sub>2</sub>O<sub>4</sub>-Foam

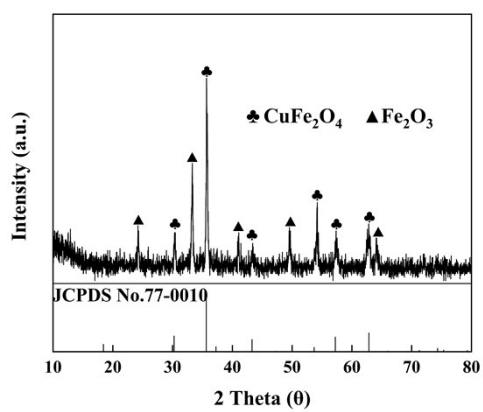

**Fig. S2.** The XRD images of bare CuFe<sub>2</sub>O<sub>4</sub>.

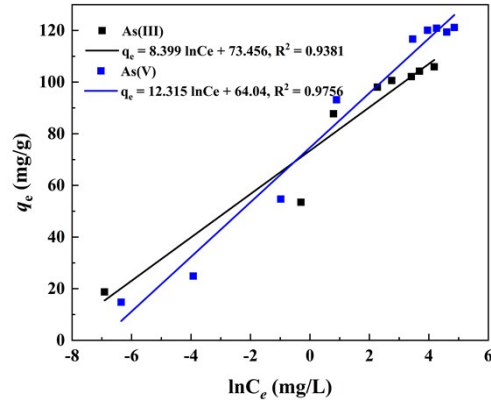

**Fig. S3.** The fitting curve of As(III) and As(V) removal data by Temkin model.

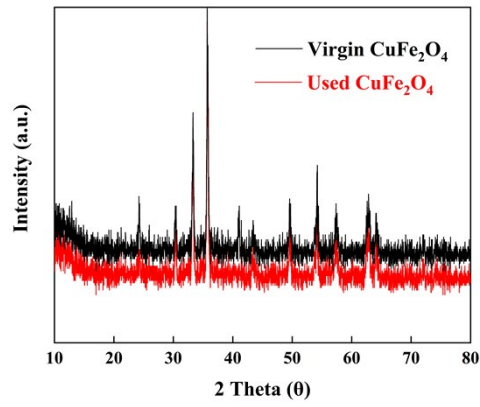

**Fig. S4.** XRD images of virgin and used  $\text{CuFe}_2\text{O}_4$ .

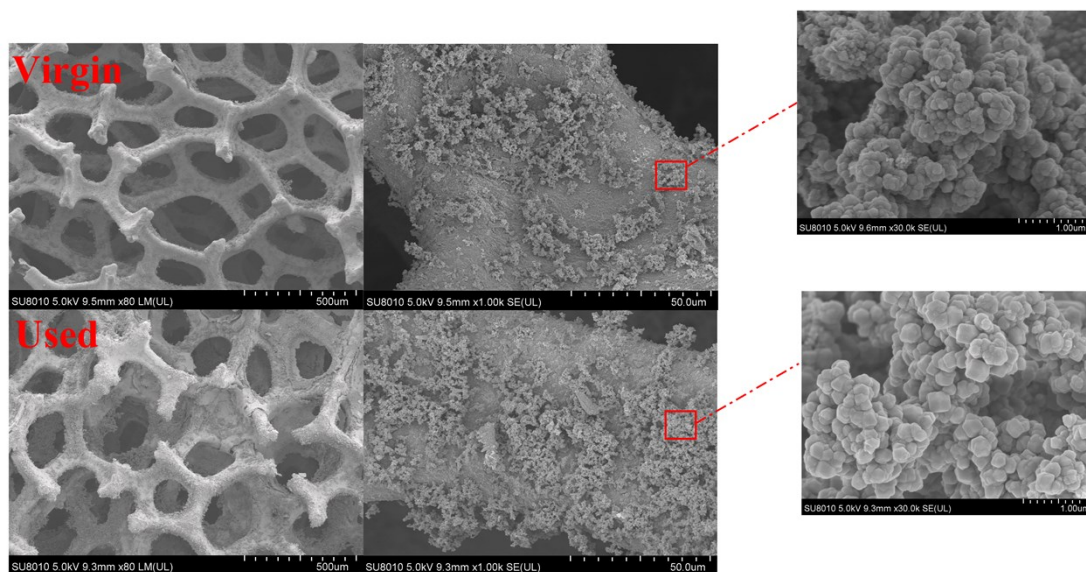

**Fig. S5.** SEM images of virgin and used (without regeneration)  $\text{CuFe}_2\text{O}_4$ .

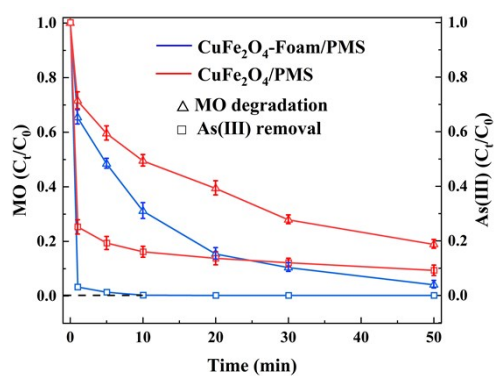

**Fig. S6.** Simultaneous removal of As(III) and degradation of MO. Conditions: one piece adsorbent, 400  $\mu\text{M}$  PMS, pH 7.0, 25  $^{\circ}\text{C}$ , 1 mg/L As(III), and 10  $\mu\text{M}$  MO.

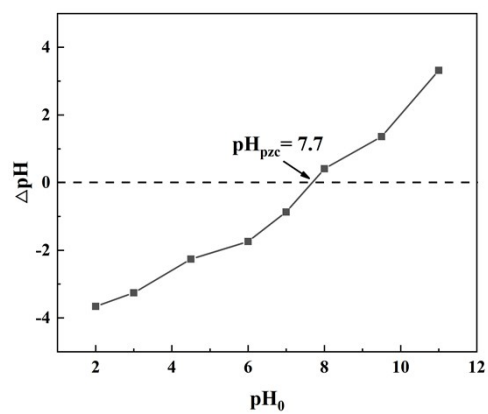

**Fig. S7.** pH<sub>pzc</sub> of CuFe<sub>2</sub>O<sub>4</sub>-Foam.

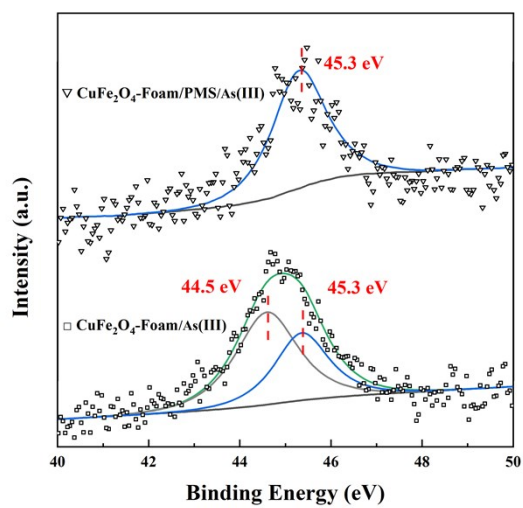

**Fig. S8.** XPS As 3d spectra of the CuFe<sub>2</sub>O<sub>4</sub>-Foam with or without PMS.

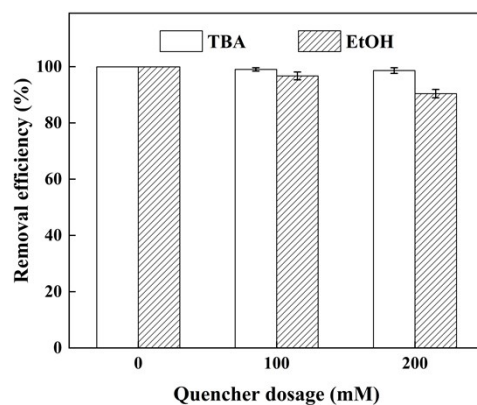

**Fig. S9.** Removal efficiency of As(III) in presence of different quenchers, reaction time for (b) :180 min.

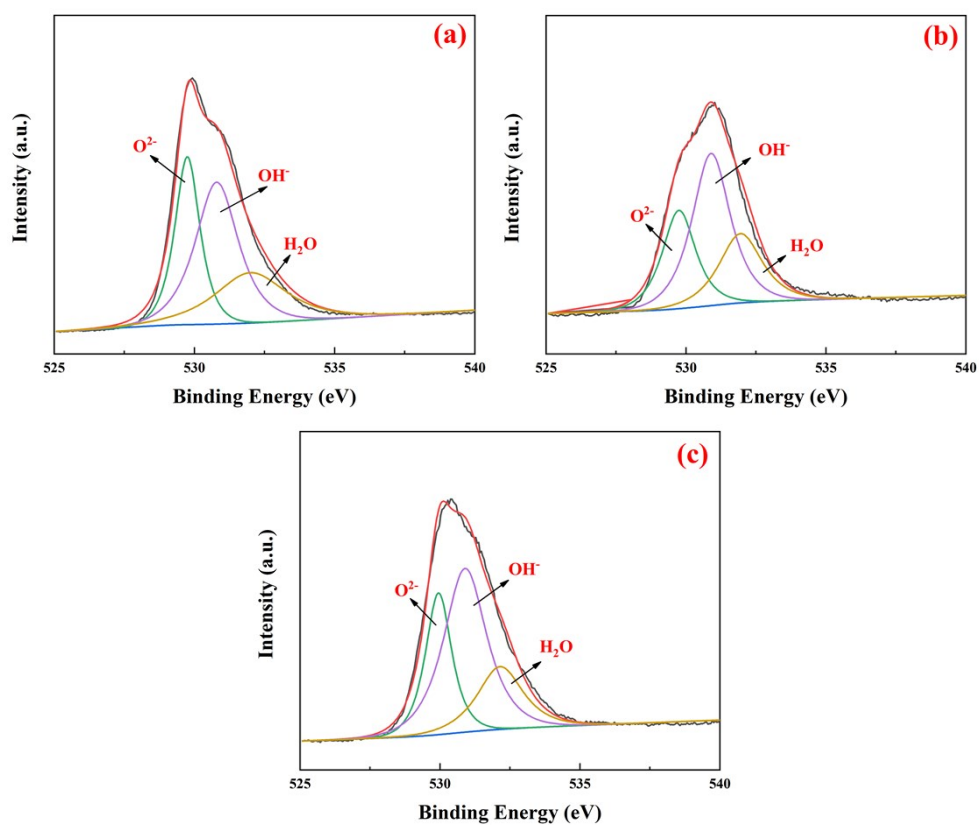

**Fig. S10.** XPS O 1s spectra of virgin CuFe<sub>2</sub>O<sub>4</sub>-Foam (a), with (b) or without PMS (c).

- 1 Z. Wang, R.T. Bush, L.A. Sullivan, C. Chen, J. Liu, Selective Oxidation of Arsenite by Peroxymonosulfate with High Utilization Efficiency of Oxidant, *Environ. Sci. Technol.*, 2014, **48**, 3978-3985.
- 2 S. Zhang, H. Niu, Y. Cai, X. Zhao, Y. Shi, Arsenite and arsenate adsorption on coprecipitated bimetal oxide magnetic nanomaterials:  $\text{MnFe}_2\text{O}_4$  and  $\text{CoFe}_2\text{O}_4$ . *Chem. Eng. J.*, **2010**, 158 (3), 599-607.
- 3 W.H. Xu, L. Wang, J. Wang, G.P. Sheng, X.J. Huang, Superparamagnetic mesoporous ferrite nanocrystal clusters for efficient removal of arsenite from water. *Crystengcomm*, **2013**, 15 (39), 7895.
- 4 Y.-J. Tu, C.-F. You, C.-K. Chang, S.-L. Wang, T.-S. Chan, Adsorption behavior of As(III) onto a copper ferrite generated from printed circuit board industry. *Chem. Eng. J.*, **2013**, 225, 433-439.
- 5 L.-K. Wu, H. Wu, H.-B. Zhang, H.-Z. Cao, G.-Y. Hou, Y.-P. Tang, G.-Q. Zheng, Graphene oxide/ $\text{CuFe}_2\text{O}_4$  foam as an efficient absorbent for arsenic removal from water. *Chem. Eng. J.*, **2018**, 334, 1808-1819.
- 6 M.A. Malana, R.B. Qureshi, M.N. Ashiq, Adsorption studies of arsenic on nano aluminium doped manganese copper ferrite polymer (MA, VA, AA) composite: Kinetics and mechanism. *Chem. Eng. J.*, **2011**, 172 (2), 721-727.
- 7 Y. Wei, H. Liu, C. Liu, S. Luo, Y. Liu, X. Yu, J. Ma, K. Yin, H. Feng, Fast and efficient removal of As(III) from water by  $\text{CuFe}_2\text{O}_4$  with peroxymonosulfate: Effects of oxidation and adsorption. *Water Res.*, **2019**, 150, 182-190.
- 8 F. liu, W.M. Yang, W.W. Li, G.-C., Zhao. Simultaneous Oxidation and Sequestration of Arsenic(III) from Aqueous Solution by Copper Aluminate with Peroxymonosulfate: A Fast and Efficient Heterogeneous Process, *ACS Omega*, **2021**.
